# Supplementary material for: Silver Doped Mesoporous Silica Nanoparticles Based Electrochemical Enzyme-Less Sensor for Determination of H2O2 Released from Live Cells
Source: PubMed Central journal article supplement (PMC6523606; doi:10.3390/mi10040268), 2019-04-21
Supplement: micromachines-10-00268-s001.pdf [file micromachines-10-00268-s001.pdf]

Article

# Silver Doped Mesoporous Silica Nanoparticles Based Electrochemical Enzyme-Less Sensor for Determination of H<sub>2</sub>O<sub>2</sub> Released from Live Cells

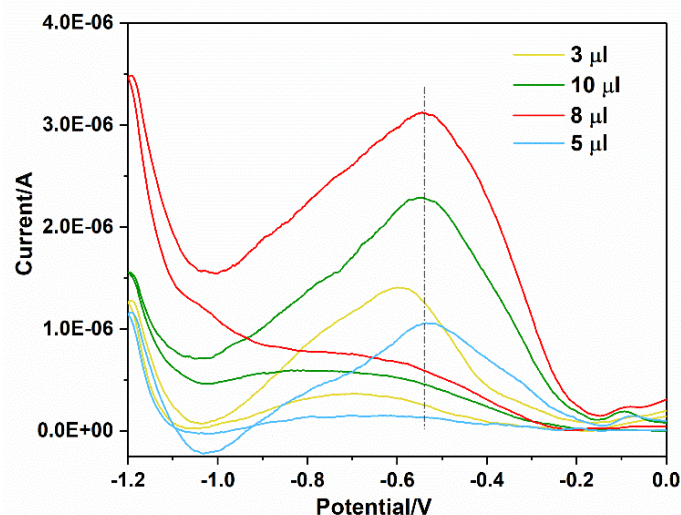

**Figure S1.** Current–potential curves of the Ag-mSiO<sub>2</sub> nanoparticles/glass carbon electrode (NPs/GCE) for electrocatalytic reduction of H<sub>2</sub>O<sub>2</sub> at the scan rate of 50 mV s<sup>-1</sup> in 0.2 M PBS solution with different modifiers of Ag-mSiO<sub>2</sub> NPs.

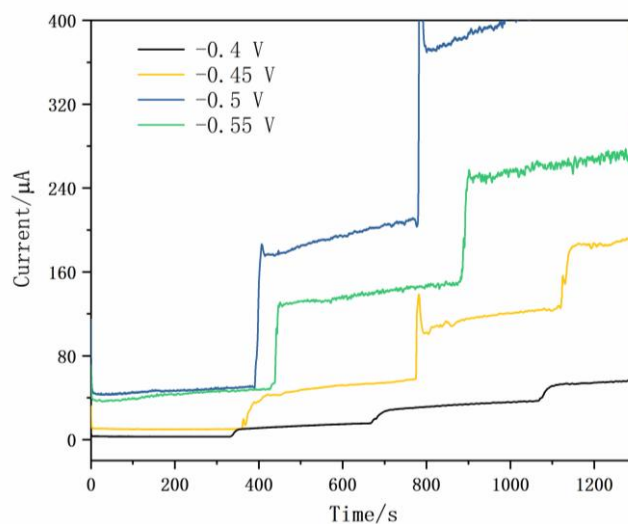

**Figure S2.** The amperometric response of Ag-mSiO<sub>2</sub> nanoparticles/glass carbon electrode (NPs/GCE) (with applied potentials of -0.40, -0.45, -0.50, and -0.55 V) in PBS solution (0.2 M, pH 6.8) upon successive additions of 1.0 mM H<sub>2</sub>O<sub>2</sub>.

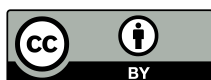

© 2018 by the author. Licensee MDPI, Basel, Switzerland. This article is an open access article distributed under the terms and conditions of the Creative Commons Attribution (CC BY) license (<http://creativecommons.org/licenses/by/4.0/>).
